# Supplementary material
Source: PubMed Central journal article supplement (PMC7096913)
Supplement: 41594_2005_BFnsmb999_MOESM2_ESM.pdf [file 41594_2005_BFnsmb999_MOESM2_ESM.pdf]

## Supplementary Figure 2

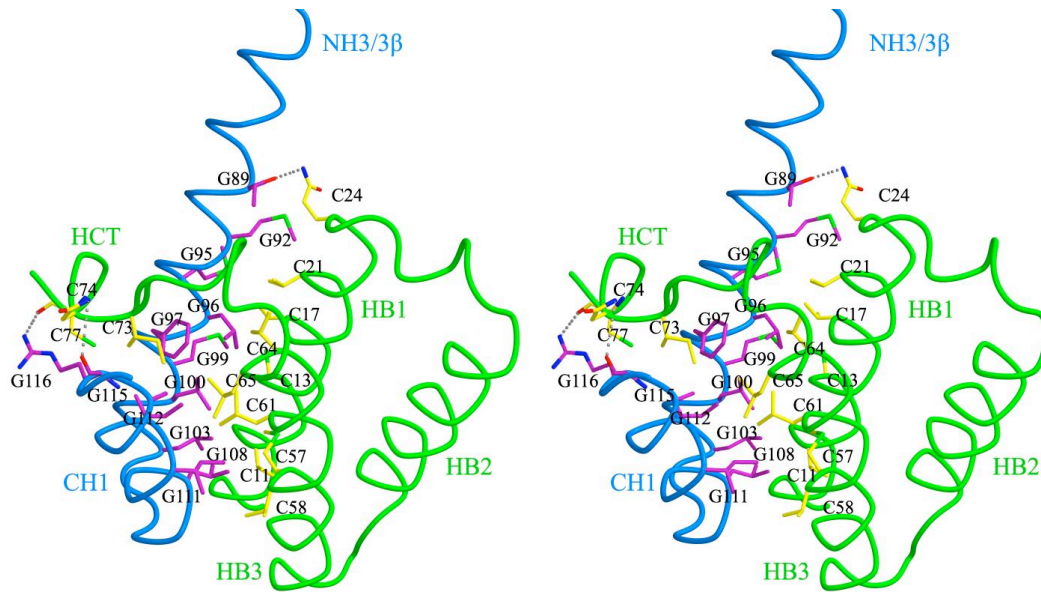

**Stereo view of the interface at site 1 and site 2.** This figure generated from chain C and chain G represents a normal example. Secondary structures are shown as thick green line (nsp7) and thick sky-blue line (nsp8I/II), and are labeled with respective colors. Residues participating in interface interactions are shown, labeled with chain name and colored in yellow for nsp7 and magenta for nsp8I/II. Hydrogen bonds are shown as dashed gray lines.
